# Supplementary material for: Dehydration and rehydration behavior of a trinodal topological 3-D framework of Cd(II) benzimidazole-5,6-dicarboxylate
Source: Royal Society of Chemistry journal article supplement (doi:10.1039/b909772d), 2009-01-01

## Supporting Information

### Dehydration and Rehydration Behaviors of a New Trinodal Topological 3D Framework of Cd(II) Benzimidazole-5,6-dicarboxylate

*Yong-Ru Liu, Lei Li, Tao Yang, Xing-Wen Yu, and Cheng-Yong Su*

**Figure S1.** The simulated and measured powder X-ray diffraction patterns for complexes **1** and **1'**.

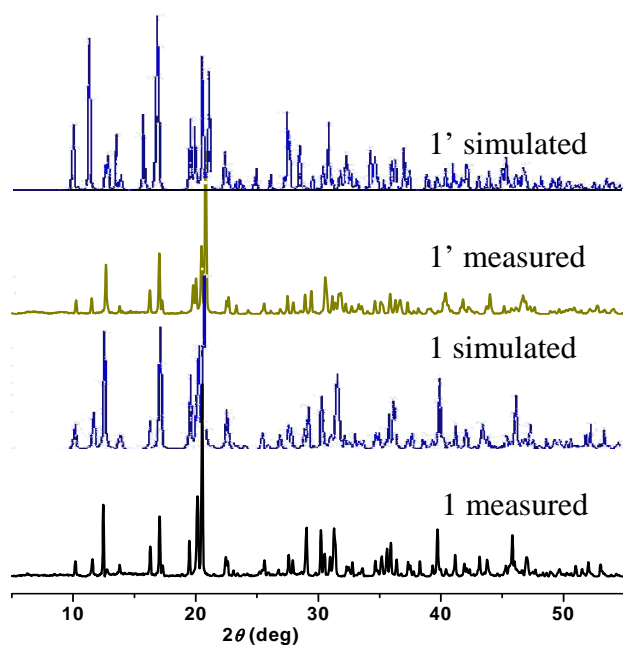

**Figure S2** Time-dependent single crystal X-Ray diffraction patterns at 348K

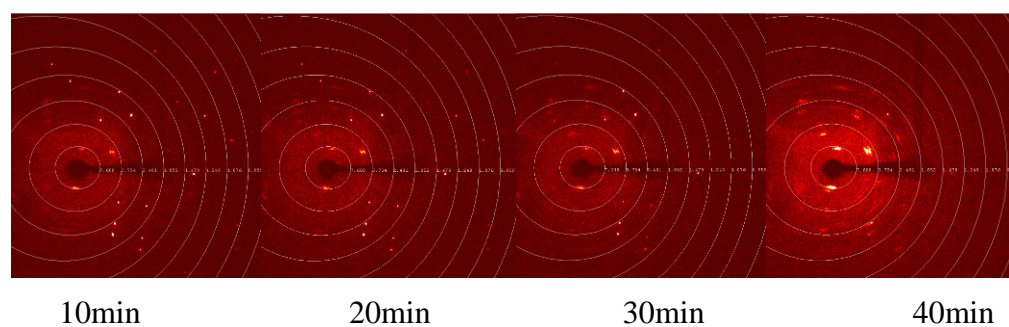

**Figure S3.** DSC curve for complex **1**.

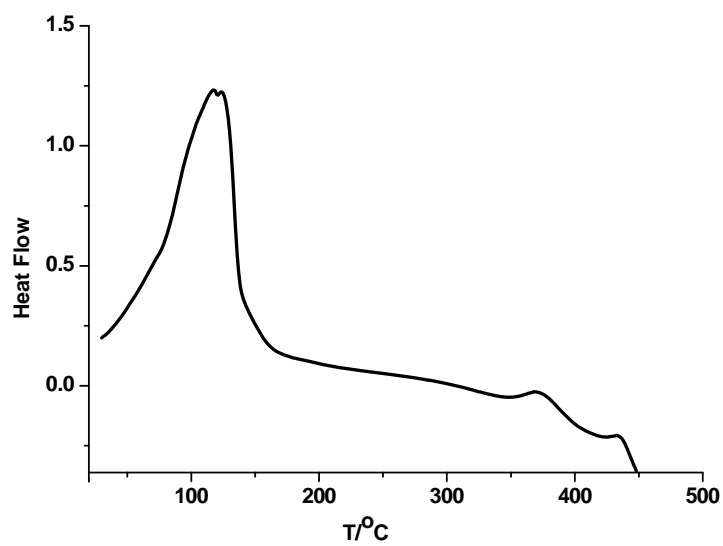

**Figure S4.** Excited (left) and emission (right) spectra of **1** in the solid state at room temperature.

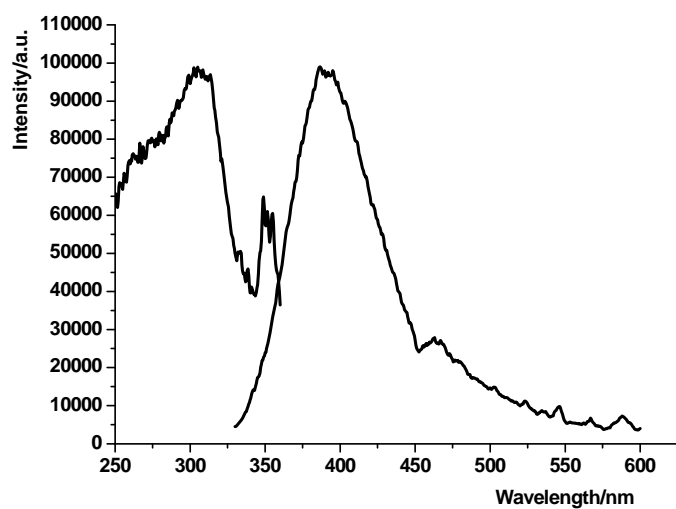

Supplement: b909772d.pdf [file b909772d.pdf]
